# Supplementary material
Source: PubMed Central journal article supplement (PMC6726560)
Supplement: NIHMS1535683-supplement-1.pdf [file NIHMS1535683-supplement-1.pdf]

Supplemental Table 1. Main analysis findings among high-risk individuals with IPMNs who have at least one affected first-degree relative with pancreas cancer (n=27)

| ID/<br>Order                                                                    | Age at<br>IPMN,<br>y/ sex | AJ | BRCA mutation                                        | Time to<br>detection<br>of lesion,<br>m | Time from<br>detection<br>to surgery,<br>m | Surveillance<br>events<br>before<br>surgery, # | Radiological findings                                                               | EUS Findings                                                           | EUS Cytology                             | Surgical Intervention/<br>Pathology           |
|---------------------------------------------------------------------------------|---------------------------|----|------------------------------------------------------|-----------------------------------------|--------------------------------------------|------------------------------------------------|-------------------------------------------------------------------------------------|------------------------------------------------------------------------|------------------------------------------|-----------------------------------------------|
| High-risk individuals who underwent surgery after EUS (n=3)                     |                           |    |                                                      |                                         |                                            |                                                |                                                                                     |                                                                        |                                          |                                               |
| 1 <sup>a</sup>                                                                  | 66/F                      | Y  | BRCA2<br>c.5946del                                   | 0                                       | 24                                         | 4                                              | Increase in size of cystic lesions throughout pancreas, largest measuring up to 2cm | 1 <3cm PB cystic lesion, 1 mural nodule in cyst                        | Non-diagnostic                           | Distal pancreatectomy/<br>IPMN with LGD       |
| 2                                                                               | 68/F                      | N  | none                                                 | 0                                       | 12                                         | 3                                              | Questionable increase in size (<4mm) of <3cm cysts                                  | 2 <3cm cystic lesions in PH/PN;<br>MPD 3.7mm in PH                     | Suspicious cells;<br>suspect MCN         | Whipple/Multifocal IPMN, borderline malignant |
| 3                                                                               | 46/F                      | Y  | none                                                 | 0                                       | 0                                          | 1                                              | <3cm PT cystic lesion                                                               | 1 <3cm PT cystic lesion                                                | Mucin and glandular cells without atypia | Distal Pancreatectomy/<br>PanIN-2             |
| ID/<br>Order                                                                    | Age at<br>IPMN,<br>y/ sex | AJ | BRCA mutation                                        | Time to<br>detection<br>of lesion,<br>m | Time since<br>lesion<br>identified,<br>m   | Surveillance<br>events after<br>detection, #   | Radiological findings                                                               | EUS Findings                                                           | EUS Cytology                             | Surgical Intervention                         |
| High-risk individuals with IPMN confirmed by EUS who did not have surgery (n=9) |                           |    |                                                      |                                         |                                            |                                                |                                                                                     |                                                                        |                                          |                                               |
| 4                                                                               | 55/F                      | Y  | BRCA1<br>c.5266dupC                                  | 0                                       | 121                                        | 18                                             | <3 stable <3cm PB cystic lesions                                                    | <3cm PB cystic lesion                                                  | Non-diagnostic                           | Recommended &<br>declined                     |
| 5                                                                               | 50/M                      | N  | BRCA1<br>c.4484G>T                                   | 0                                       | 87                                         | 9                                              | <3 stable <3cm PH/PB/PUP cystic lesions                                             | 2 <3cm PUP/PB cystic lesions                                           | --                                       | --                                            |
| 6 <sup>b</sup>                                                                  | 45/F                      | N  | BRCA1<br>c.641A>G;<br>BRCA1 VUS<br>D214G<br>(760A>G) | 0                                       | 76                                         | 13                                             | Slight increase in size of <3cm cystic lesions throughout pancreas                  | <3cm PB cyst/pseudocyst;<br><3cm PB oval mass; other small cysts noted | Non-diagnostic                           | --                                            |
| 7                                                                               | 49/F                      | Y  | BRCA2<br>c.5946del                                   | 24                                      | 63                                         | 9                                              | Stable <3cm PH cystic lesion                                                        | <3cm PH cystic lesion                                                  | --                                       | --                                            |
| 8                                                                               | 55/M                      | Y  | BRCA2<br>c.5946del                                   | 0                                       | 77                                         | 11                                             | Minimal increased size (<4mm) of few <3cm cystic lesions in PH/PN/PB                | <3cm PH cystic lesion;<br>MPD 3.2cm in PB                              | --                                       | --                                            |
| 9                                                                               | 65/F                      | Y  | BRCA2<br>c.5946del                                   | 0                                       | 60                                         | 9                                              | Several stable <3cm PB/PT cystic lesions                                            | 2 PT <3cm cystic lesions                                               | --                                       | --                                            |
| 10                                                                              | 44/F                      | N  | none                                                 | 0                                       | 122                                        | 12                                             | <3 stable <3cm PH/PT cystic lesions                                                 | <3cm PUP cystic lesion                                                 | --                                       | --                                            |
| 11                                                                              | 50/F                      | Y  | none                                                 | 34                                      | 36                                         | 6                                              | <3 stable <3cm PT cystic lesions                                                    | <3cm PT cystic lesion                                                  | --                                       | --                                            |
| 12                                                                              | 56/F                      | Y  | none                                                 | 0                                       | 13                                         | 3                                              | ≥3 stable PB/PH <3cm cystic lesions                                                 | Multiple <3cm cysts throughout entire pancreas                         | --                                       | --                                            |

Supplemental Table 1. Main analysis findings among high-risk individuals with IPMNs who have at least one affected first-degree relative with pancreas cancer (n=27)

| High-risk individuals with EUS that did not visualize IPMN (n=7) |      |   |                                 |    |     |    |                                                                                |                                                  |    |    |
|------------------------------------------------------------------|------|---|---------------------------------|----|-----|----|--------------------------------------------------------------------------------|--------------------------------------------------|----|----|
| 17                                                               | 65/F | Y | <i>BRCA1</i> exon13 duplication | 0  | 21  | 3  | Stable <3cm PB cystic lesion                                                   | Negative                                         | -- | -- |
| 18                                                               | 59/M | Y | <i>BRCA1</i> c.5266dupC         | 0  | 1   | 1  | ≥3 stable <3cm PN cystic lesions                                               | Unremarkable; noted some echogenic strands in PH | -- | -- |
| 19                                                               | 57/F | Y | <i>BRCA2</i> c.5946del          | 0  | 55  | 8  | Stable <3cm PH cystic lesion                                                   | Negative                                         | -- | -- |
| 20                                                               | 64/F | Y | <i>BRCA2</i> c.5946del          | 0  | 27  | 3  | ≥3 Stable <3cm PH/PB/PT cystic lesions                                         | Negative                                         | -- | -- |
| 21                                                               | 65/F | N | <i>BRCA2</i> c.6938-2A>G        | 0  | 101 | 10 | Stable <3cm PH/PUP cystic lesion                                               | Negative                                         | -- | -- |
| 22                                                               | 46/F | N | none                            | 0  | 72  | 10 | Stable <3cm PH cystic lesion                                                   | Negative                                         | -- | -- |
| 13                                                               | 72/M | Y | none                            | 39 | 102 | 9  | Small increase in size of <3cm PUP cystic lesion; stable <3cm PN cystic lesion | MPD=6mm in PUP; no lesion found                  | -- | -- |
| High-risk individuals with no EUS (n=8)                          |      |   |                                 |    |     |    |                                                                                |                                                  |    |    |
| 24                                                               | 64/F | Y | <i>BRCA1</i> c.5266dupC         | 95 | 0   | 0  | Few <3cm cystic lesions                                                        | --                                               | -- | -- |
| 25                                                               | 68/M | Y | <i>BRCA2</i> c.5946del          | 96 | 30  | 1  | ≥3 stable PUP/PT <3cm cystic lesions                                           | --                                               | -- | -- |
| 26                                                               | 59/M | N | <i>BRCA2</i> c.6037A>T          | 16 | 1   | 2  | <3cm stable cystic lesion in PB/PT junction                                    | --                                               | -- | -- |
| 27                                                               | 59/F | N | none                            | 0  | 110 | 9  | ≥3 stable <3cm cystic lesions throughout entire pancreas                       | --                                               | -- | -- |
| 28                                                               | 68/F | N | none                            | 0  | 79  | 8  | Stable <3cm PH cystic lesion                                                   | --                                               | -- | -- |
| 29                                                               | 62/F | Y | none                            | 0  | 63  | 10 | ≥3 stable <3cm cystic lesions throughout entire pancreas                       | --                                               | -- | -- |
| 30                                                               | 53/F | Y | none                            | 0  | 54  | 5  | Stable <3cm PT cystic lesion                                                   | --                                               | -- | -- |
| 31                                                               | 50/F | N | none                            | 0  | 15  | 3  | Stable <3cm PT cystic lesion                                                   | --                                               | -- | -- |

<sup>a</sup> Patient developed pancreatic adenocarcinoma 9 months post-surgery and is now deceased

<sup>b</sup> One HRI (1880) scheduled for repeat EUS to follow-up on oval mass previously seen on imaging

--, no FNA or surgery

AJ, Ashkenazi Jewish

IPMN, intraductal papillary mucinous neoplasm

LGD, low grade dysplasia

MCN, mucinous cystic neoplasm

MPD, main pancreatic duct

PB, pancreatic body; PH, pancreatic head; PT, pancreatic tail; PUP, pancreatic uncinuate process
