# Supplementary material
Source: PubMed Central journal article supplement (PMC6726560)
Supplement: NIHMS1535683-supplement-2.pdf [file NIHMS1535683-supplement-2.pdf]

Supplemental Table 2. Secondary analysis findings among high-risk *BRCA1/2* individuals with IPMNs who have  $\geq 1$  affected relative with pancreas cancer but no affected first-degree relatives (n=7)

| ID/<br>Order                                     | Age at<br>IPMN/sex | AJ | <i>BRCA</i> mutation          | Time to<br>detection of<br>lesion, m | Time since<br>lesion<br>identified, m | Surveillance<br>events after<br>detection, # | Radiological findings                                                    | EUS findings                                                          |
|--------------------------------------------------|--------------------|----|-------------------------------|--------------------------------------|---------------------------------------|----------------------------------------------|--------------------------------------------------------------------------|-----------------------------------------------------------------------|
| High-risk individuals who had EUS (n=4)          |                    |    |                               |                                      |                                       |                                              |                                                                          |                                                                       |
| 14                                               | 63/F               | Y  | <i>BRCA1</i> c.68_69del       | 0                                    | 110                                   | 11                                           | $\geq 3$ stable <3cm PB/PT cystic lesions                                | Multiple <3cm cysts throughout entire pancreas                        |
| 15                                               | 54/F               | N  | <i>BRCA2</i> c.2175dupA       | 23                                   | 14                                    | 3                                            | Newly visualized dilated side branch duct in PB (2-3mm). MPD not dilated | <3cm PB cystic lesion; FNA CEA<0.5; Cyst negative for malignant cells |
| 16                                               | 57/F               | N  | <i>BRCA2</i> c.755_758delACAG | 13                                   | 43                                    | 2                                            | Stable PB <3cm cystic lesion                                             | <3cm PB cystic lesion                                                 |
| 23                                               | 73/M               | Y  | <i>BRCA2</i> c.5946del        | 12                                   | 60                                    | 8                                            | Stable <3cm PB cystic lesion                                             | Negative; no cystic lesion identified                                 |
| High-risk individuals who did not have EUS (n=3) |                    |    |                               |                                      |                                       |                                              |                                                                          |                                                                       |
| 32                                               | 58/M               | Y  | <i>BRCA1</i>                  | 28                                   | 0                                     | 0                                            | <3cm PB/PT cystic lesions                                                | --                                                                    |
| 33                                               | 61/M               | Y  | <i>BRCA1</i> c.68_69del       | 11                                   | 28                                    | 11                                           | Stable <3cm PH/PT/PUP cystic lesions                                     | --                                                                    |
| 34                                               | 65/M               | Y  | <i>BRCA2</i> c.5946del        | 9                                    | 12                                    | 1                                            | <3 stable <3cm PT/PUP cystic lesions                                     | --                                                                    |

--, aspiration not performed, or surgery not conducted

AJ, Ashkenazi Jewish

IPMN, intraductal papillary mucinous neoplasm

MCN, mucinous cystic neoplasm

MPD, main pancreatic duct

PB, pancreatic body; PH, pancreatic head; PT, pancreatic tail; PUP, pancreatic uncinata process
